# Supplementary material for: Designed, synthetically accessible bryostatin analogues potently induce activation of latent HIV reservoirs in vitro
Source: Springer Nature journal article supplement (doi:10.1038/nchem.1395), 2012-07-13
Supplement: 41557_2012_BFnchem1395_MOESM9_ESM.mol [file 41557_2012_BFnchem1395_MOESM9_ESM.mol]

  ChemDraw06191207142D

 58 61  0  0  0  0  0  0  0  0999 V2000
   -1.5761    2.6091    0.0000 C   0  0  0  0  0  0  0  0  0  0  0  0
   -1.5673    1.7841    0.0000 C   0  0  0  0  0  0  0  0  0  0  0  0
   -0.8485    1.3792    0.0000 C   0  0  0  0  0  0  0  0  0  0  0  0
   -0.1384    1.7993    0.0000 O   0  0  0  0  0  0  0  0  0  0  0  0
   -0.1472    2.6243    0.0000 C   0  0  0  0  0  0  0  0  0  0  0  0
   -0.8660    3.0292    0.0000 C   0  0  0  0  0  0  0  0  0  0  0  0
    1.3585    3.0310    0.0000 C   0  0  0  0  0  0  0  0  0  0  0  0
    1.6720    2.2679    0.0000 O   0  0  0  0  0  0  0  0  0  0  0  0
    2.4896    2.1578    0.0000 C   0  0  0  0  0  0  0  0  0  0  0  0
    2.9937    2.8109    0.0000 C   0  0  0  0  0  0  0  0  0  0  0  0
    2.6802    3.5740    0.0000 C   0  0  0  0  0  0  0  0  0  0  0  0
    1.8626    3.6841    0.0000 C   0  0  0  0  0  0  0  0  0  0  0  0
   -0.7429    0.4122    0.0000 C   0  0  0  0  0  0  0  0  0  0  0  0
    2.8054    1.4620    0.0000 C   0  0  0  0  0  0  0  0  0  0  0  0
   -0.0241    0.0073    0.0000 C   0  0  0  0  0  0  0  0  0  0  0  0
   -0.0153   -0.8177    0.0000 C   0  0  0  0  0  0  0  0  0  0  0  0
    0.7041   -1.2226    0.0000 C   0  0  0  0  0  0  0  0  0  0  0  0
    1.4141   -0.8025    0.0000 O   0  0  0  0  0  0  0  0  0  0  0  0
    0.7129   -2.0476    0.0000 C   0  0  0  0  0  0  0  0  0  0  0  0
    1.4317   -2.4525    0.0000 C   0  0  0  0  0  0  0  0  0  0  0  0
    2.1417   -2.0324    0.0000 C   0  0  0  0  0  0  0  0  0  0  0  0
    2.1329   -1.2074    0.0000 C   0  0  0  0  0  0  0  0  0  0  0  0
    2.8401   -0.7885    0.0000 C   0  0  0  0  0  0  0  0  0  0  0  0
    3.5413    1.1425    0.0000 C   0  0  0  0  0  0  0  0  0  0  0  0
    3.5419    0.4566    0.0000 C   0  0  0  0  0  0  0  0  0  0  0  0
    4.2607    0.0517    0.0000 C   0  0  0  0  0  0  0  0  0  0  0  0
    3.5595   -1.1934    0.0000 C   0  0  0  0  0  0  0  0  0  0  0  0
    3.5683   -2.0184    0.0000 C   0  0  0  0  0  0  0  0  0  0  0  0
    4.2667   -0.7750    0.0000 O   0  0  0  0  0  0  0  0  0  0  0  0
    4.9685    0.4689    0.0000 O   0  0  0  0  0  0  0  0  0  0  0  0
    0.6953   -0.4005    0.0000 O   0  0  0  0  0  0  0  0  0  0  0  0
   -2.2920    3.0129    0.0000 C   0  0  0  0  0  0  0  0  0  0  0  0
    1.4404   -3.2746    0.0000 C   0  0  0  0  0  0  0  0  0  0  0  0
    0.0051   -2.4659    0.0000 O   0  0  0  0  0  0  0  0  0  0  0  0
   -0.8403   -0.8265    0.0000 C   0  0  0  0  0  0  0  0  0  0  0  0
   -0.5923   -1.4071    0.0000 C   0  0  0  0  0  0  0  0  0  0  0  0
    0.0139   -3.2909    0.0000 C   0  0  0  0  0  0  0  0  0  0  0  0
    0.7327   -3.6958    0.0000 O   0  0  0  0  0  0  0  0  0  0  0  0
    1.9727    4.5017    0.0000 C   0  0  0  0  0  0  0  0  0  0  0  0
    1.2095    4.1882    0.0000 C   0  0  0  0  0  0  0  0  0  0  0  0
    4.2871   -2.4233    0.0000 O   0  0  0  0  0  0  0  0  0  0  0  0
    2.1592   -3.6795    0.0000 C   0  0  0  0  0  0  0  0  0  0  0  0
    2.1680   -4.5017    0.0000 O   0  0  0  0  0  0  0  0  0  0  0  0
    2.8669   -3.2608    0.0000 O   0  0  0  0  0  0  0  0  0  0  0  0
    3.5833   -3.6644    0.0000 C   0  0  0  0  0  0  0  0  0  0  0  0
    4.3385    1.6094    0.0000 O   0  0  0  0  0  0  0  0  0  0  0  0
   -4.9685   -3.7567    0.0000 C   0  0  0  0  0  0  0  0  0  0  0  0
   -4.2609   -3.3380    0.0000 C   0  0  0  0  0  0  0  0  0  0  0  0
   -3.5444   -3.7415    0.0000 C   0  0  0  0  0  0  0  0  0  0  0  0
   -2.8367   -3.3227    0.0000 C   0  0  0  0  0  0  0  0  0  0  0  0
   -2.1203   -3.7262    0.0000 C   0  0  0  0  0  0  0  0  0  0  0  0
   -1.4126   -3.3075    0.0000 C   0  0  0  0  0  0  0  0  0  0  0  0
   -0.6962   -3.7110    0.0000 C   0  0  0  0  0  0  0  0  0  0  0  0
    0.5006    3.1407    0.0000 C   0  0  0  0  0  0  0  0  0  0  0  0
   -2.9999    2.5946    0.0000 C   0  0  0  0  0  0  0  0  0  0  0  0
   -3.7120    3.0057    0.0000 O   0  0  0  0  0  0  0  0  0  0  0  0
   -2.9999    1.7723    0.0000 O   0  0  0  0  0  0  0  0  0  0  0  0
   -2.2878    1.3612    0.0000 C   0  0  0  0  0  0  0  0  0  0  0  0
  1  2  1  0      
  2  3  1  0      
  3  4  1  0      
  5  4  1  1      
  5  6  1  0      
  6  1  1  0      
  7  8  1  1      
  8  9  1  0      
  9 10  1  0      
 10 11  1  0      
 11 12  1  0      
 12  7  1  0      
  3 13  1  1      
  9 14  1  1      
 13 15  2  0      
 15 16  1  0      
 16 17  1  0      
 17 18  1  0      
 17 19  1  0      
 19 20  1  0      
 20 21  1  0      
 21 22  1  0      
 22 18  1  0      
 22 23  1  6      
 14 24  1  0      
 24 25  1  0      
 25 26  1  0      
 23 27  1  0      
 27 28  1  0      
 27 29  1  1      
 26 29  1  0      
 26 30  2  0      
 28 41  1  0      
 17 31  1  1      
  1 32  2  0      
 20 33  2  0      
 19 34  1  6      
 16 35  1  0      
 16 36  1  0      
 33 42  1  0      
 24 46  1  1      
 34 37  1  0      
 37 38  2  0      
 37 53  1  0      
 12 39  1  0      
 12 40  1  0      
 42 43  2  0      
 42 44  1  0      
 44 45  1  0      
 47 48  1  0      
 48 49  1  0      
 49 50  1  0      
 50 51  1  0      
 51 52  1  0      
 52 53  1  0      
  5 54  1  0      
  7 54  1  0      
 32 55  1  0      
 55 56  2  0      
 55 57  1  0      
 57 58  1  0      
M  END
